# Supplementary material for: Evaluating the Impact of Family History and Polygenic Risk Scores on Cardiometabolic Disease Risk
Source: Research Square preprint supplement (doi:10.21203/rs.3.rs-7142452/v1), 2025-08-01
Supplement: Supplementary file 1 [file c8cd299d0275b3d99be2b4e4.docx]

**Supplemental Information**

**Table S1. Association (Odds Ratios) of PRS and FHS with cardiometabolic traits**

|  | **FHS**  **OR** **(95% CI)** | **FHS adjusted with PRS**  **OR** **(95% CI)** | **PRS**  **OR** **(95% CI)** | **PRS adjusted with FHS**  **OR** **(95% CI)** |
| --- | --- | --- | --- | --- |
| Type 2 Diabetes | 1.40 (1.38 - 1.42) | 1.34 (1.32 - 1.36) | 2.25 (2.18 - 2.33) | 2.10 (2.03 - 2.18) |
| Obesity | 1.33 (1.31 - 1.34) | 1.28 (1.26 - 1.29) | 1.59 (1.57 - 1.62) | 1.55 (1.52 - 1.57) |
| Hypertension | 1.31 (1.29 - 1.33) | 1.26 (1.24 - 1.28) | 1.59 (1.55 - 1.62) | 1.54 (1.51 - 1.57) |
| Coronary Artery Disease | 1.30 (1.28 - 1.33) | 1.26 (1.24 - 1.29) | 1.59 (1.55 - 1.64) | 1.53 (1.49 - 1.58) |


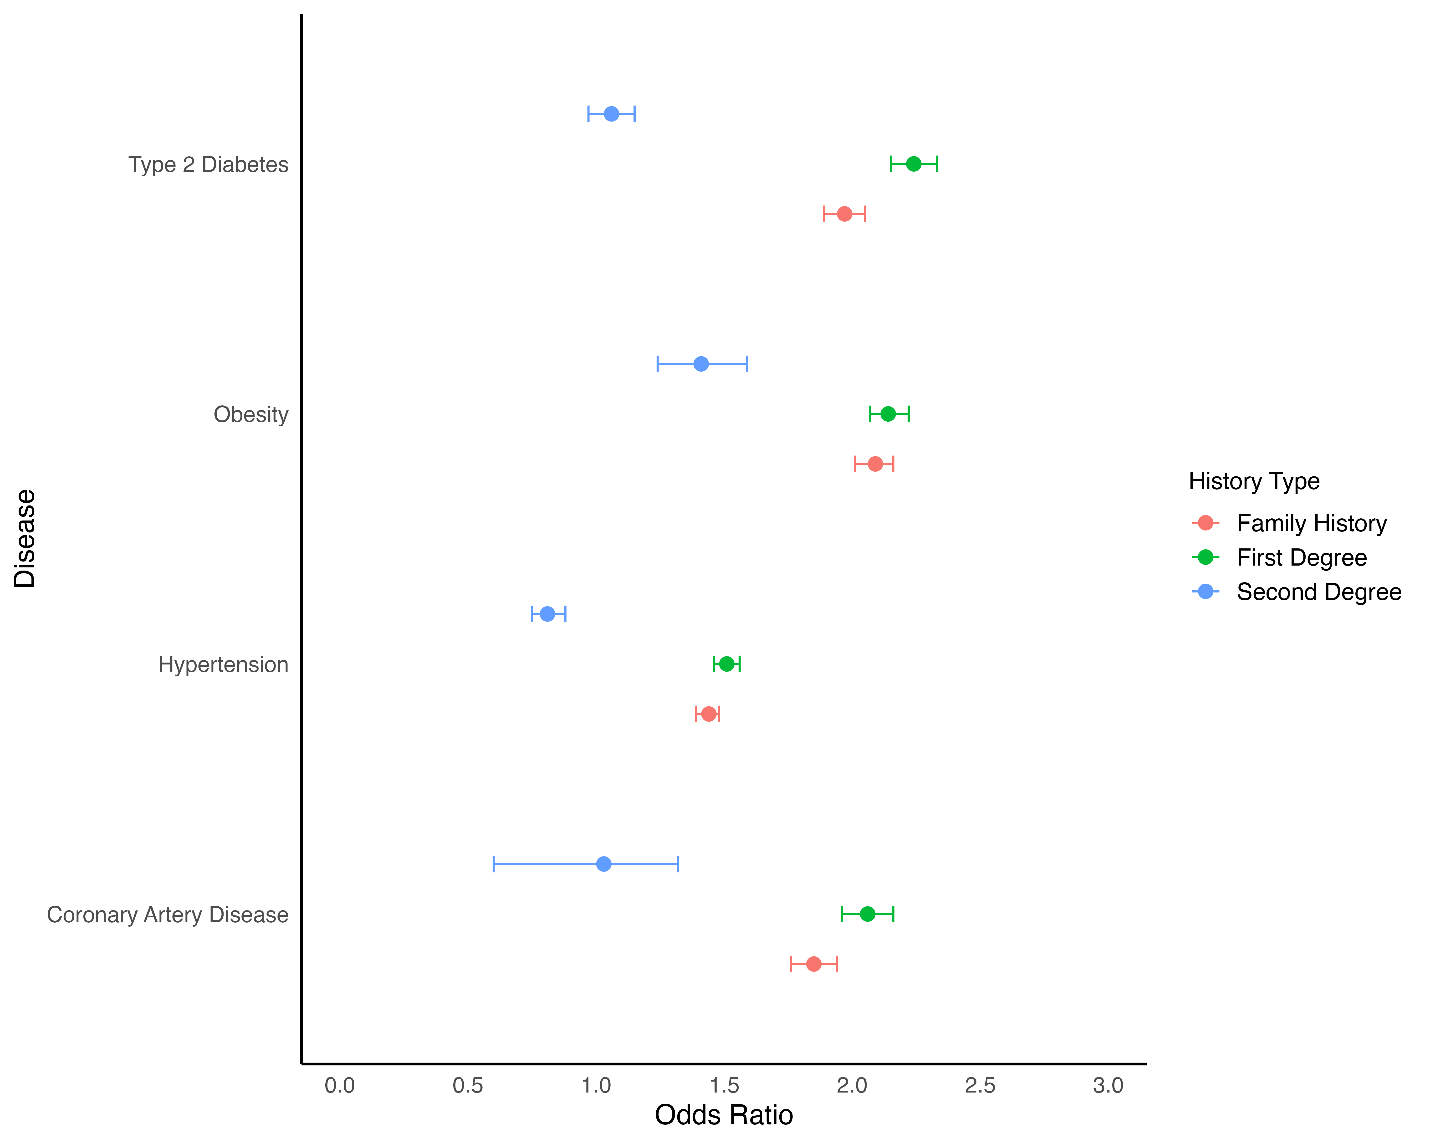


**Figure S1. Association between family history, degree of family history and cardiometabolic conditions.** Forest plot displaying the odds ratios (ORs) and 95% confidence intervals for the association between family history and cardiometabolic disease outcomes including type 2 diabetes, obesity, hypertension and coronary artery disease. Estimates are shown separately for positive family history, first-degree family history, and second-degree family history.


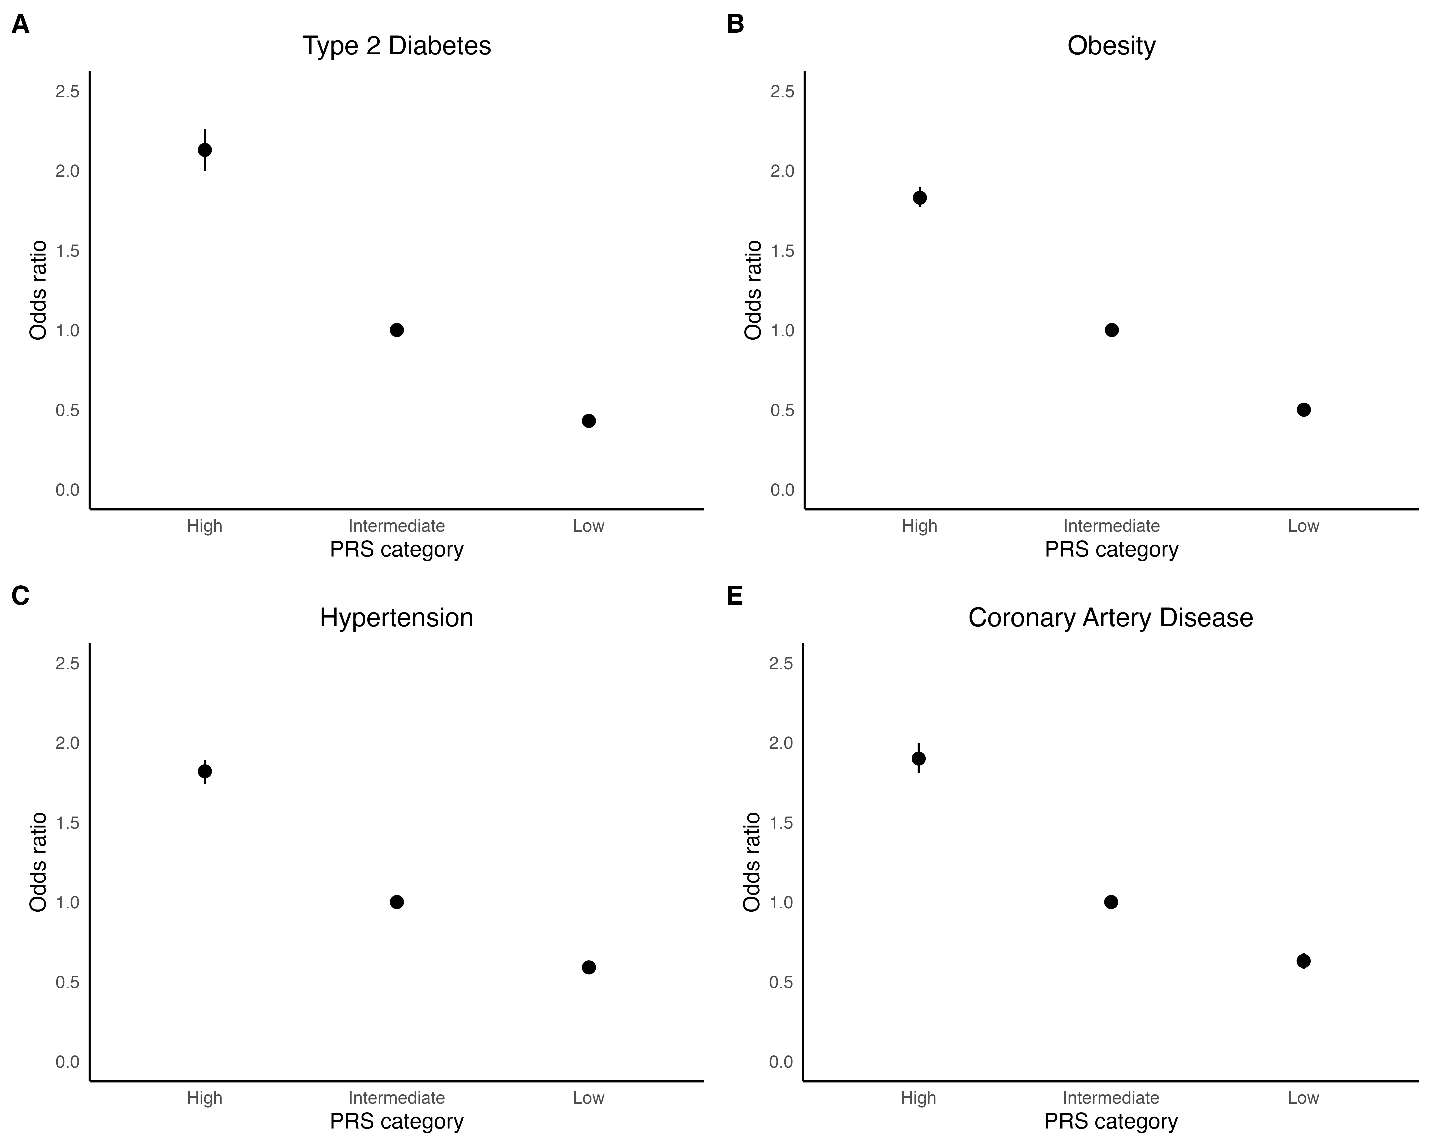


**Figure S2. Association between categorical PRS and cardiometabolic conditions.** Participants were stratified into three PRS categories: low (≤20th percentile), intermediate (20th–80th percentile), and high (≥80th percentile). We evaluated the association between PRS category and the prevalence of type 2 diabetes, obesity, hypertension, and coronary artery disease.
